# Supplementary material
Source: publisher figshare collection journal article supplement (https://gsapubs.figshare.com/articles/dataset/_/12546158)
Supplement: Supplementary file 1 [file 1]

## **ADDITIONAL DATA REPOSITORY FILES:**

## **GEOCHRONOLOGY**

### **METHODS Monazite**

#### **Geochronology Methods**

For the U-Th/Pb data, a primary reference material, “44096” (424 Ma Pb/U isotope dilution-thermal ionization mass spectrometry age; Aleinikoff et al., 2006) was employed to monitor and correct for mass bias as well as Pb/U and Pb/Th downhole fractionation. To monitor data accuracy, a secondary reference monazite “Manangotry” (552.9 Ma  $^{206}\text{Pb}/^{238}\text{U}$ , 554 Ma  $^{207}\text{Pb}/^{206}\text{Pb}$  ID-TIMS dates; Horstwood et al., 2003) was analyzed concurrently (once every five unknowns) and mass bias- and fractionation-corrected based on measured isotopic ratios of the primary reference material. During the analytical period, repeat analyses of Manangotry gave a weighted mean  $^{206}\text{Pb}/^{238}\text{U}$  date of  $562 \pm 3$  Ma, mean square weighted deviation (MSWD) = 1.1, and a weighted mean  $^{208}\text{Pb}/^{232}\text{Th}$  date of  $525 \pm 3$  Ma, MSWD = 0.8 ( $2\sigma$ ) ( $n = 21$ ). Repeat analyses of FC-1 (55.7 Ma  $^{206}\text{Pb}/^{238}\text{U}$  ID-TIMS age; Horstwood et al., 2003) gave a weighted mean  $^{206}\text{Pb}/^{238}\text{U}$  date of  $55.9 \pm 0.1$  Ma, mean square weighted deviation (MSWD) = 1.0, and a weighted mean  $^{208}\text{Pb}/^{232}\text{Th}$  date of  $54.9 \pm 0.2$  Ma, MSWD = 0.8 ( $2\sigma$ ) ( $n = 32$ ). All uncertainties are quoted at  $2\sigma$  and include contributions from the external reproducibility of the primary reference material for the  $^{207}\text{Pb}/^{206}\text{Pb}$ ,  $^{206}\text{Pb}/^{238}\text{U}$ , and  $^{208}\text{Pb}/^{232}\text{Th}$  ratios.

#### **Muscovite $^{40}\text{Ar}/^{39}\text{Ar}$ Geochronology Methods**

Muscovite mineral separates were obtained by hand-crushing samples and hand-picking grains clear of inclusions and alteration under a binocular microscope. Muscovite separates were wrapped in aluminum foil, irradiated, and analyzed.

Five samples (SETK-05, MSY-03, MARK-07, MADK-12, MSY-08) from the Annapurna foothills were analyzed at the Geological Survey of Canada, Ottawa, Ontario using the procedure of Kellett and Joyce (2014). Mineral separates and Fish Canyon sanidine flux monitor ( $^{40}\text{Ar}/^{39}\text{Ar}$  date of  $28.305 \pm 0.036$  Ma; Renne et al., 2010) were irradiated with batch GSC Rad. #67 in an aluminum canister with fast neutrons in medium flux position 8B for 63.7 h at the McMaster Nuclear Reactor, Hamilton, Ontario. Multi-grain aliquots of muscovite grains were step-heated with a Photon Machines Inc. Fusion 10.6 55W  $\text{CO}_2$  laser with homogenizer lens. Released gas was cleaned by getters for 4 min and analyzed over 10 min using a Nu Instruments Noblesse multicollector mass spectrometer.  $^{40}\text{Ar}$ ,  $^{39}\text{Ar}$ ,  $^{38}\text{Ar}$ ,  $^{37}\text{Ar}$  and  $^{36}\text{Ar}$  isotope values were extrapolated to zero time. Atmospheric  $^{40}\text{Ar}/^{36}\text{Ar}$  analyses were conducted every 10 steps to monitor mass fractionation of Ar isotopes and the relative efficiency of the different detectors. Blank runs were conducted every 4 steps and values were subtracted from the proceeding sample gas values. Corrections were made for radioactive decay and neutron-induced isotopes. These corrections, along with age calculations and error propagation, were performed with Mass Spec 7.93 software (Deino, 2001). Plots and final age calculations were prepared using Isoplot 3.75 (Ludwig, 2012).

Gibson, R., Godin, L., Kellett, D.A., Cottle, J.M., and Archibald, D., 2016, Diachronous deformation along the base of the Himalayan metamorphic core, central-west Nepal: GSA Bulletin, doi:10.1130/B31328.1.

An additional three samples (CHB-16, BHE-01, CHB-05) from lower Dolpo were analyzed at Queen's University, Kingston, Ontario. Mineral separates with flux monitor MAC-83 biotite ( $^{40}\text{Ar}/^{39}\text{Ar}$  date of 24.60 Ma referenced to Fish Canyon sanidine at  $28.305 \pm 0.036$  Ma; Sandeman et al., 1999; Renne et al., 2010) were irradiated for 24 h with fast neutrons in medium flux position 8B at the McMaster Nuclear Reactor in Hamilton, Ontario. Samples were heated using a 30 W New Wave Research MIR 10–30  $\text{CO}_2$  laser with a faceted lens. Released gas was cleaned by getters for 5 min and analyzed over 10 min using a MAP 216 mass spectrometer. Atmospheric  $^{40}\text{Ar}/^{36}\text{Ar}$  analyses were conducted to monitor mass fractionation of Ar isotopes. Blanks were run before every aliquot and values were subtracted from the sample gas values. Corrections were made for radioactive decay and for neutron-induced isotopes. Dates and errors were calculated using the method of Dalrymple et al. (1981) and constants of Min et al. (2000). Plots were prepared using Isoplot v. 3.75 (Ludwig, 2012).

## REFERENCES CITED

- Aleinikoff, J.N., Schenck, W.S., Plank, M.O., Srogi, L., Fanning, C.M., Kamo, S.L., and Bosbyshell, H., 2006, Deciphering igneous and metamorphic events in high-grade rocks of the Wilmington Complex, Delaware: Morphology, cathodoluminescence and backscattered electron zoning, and SHRIMP U-Pb geochronology of zircon and monazite: Geological Society of America Bulletin, v. 118, p. 39–64, doi:10.1130/B25659.1.
- Dalrymple, G.B., Alexander, E.C., Jr., Lanphere, M.A., and Kraker, G.P., 1981, Irradiation of samples for  $^{40}\text{Ar}/^{39}\text{Ar}$  dating using the Geological Survey TRIGA Reactor: U.S. Geological Survey Professional Paper 1176, 55 p.
- Deino, A.L., 2001, Mass Spec v. 5.02: Berkeley, California, Berkeley Geochronology Center.
- Horstwood, M.S.A., Foster, G.L., Parrish, R.R., Noble, S.R., and Nowell, G.M., 2003, Common-Pb corrected in situ U-Pb accessory mineral geochronology by LA-MC-ICP-MS: Journal of Analytical Atomic Spectrometry, v. 18, p. 837–846, doi:10.1039/b304365g.
- Kellett, D., and Joyce, N., 2014, Analytical details of single- and multicollection  $^{40}\text{Ar}/^{39}\text{Ar}$  measurements for conventional step-heating and total-fusion age calculation using the Nu Noblesse at the Geological Survey of Canada: Geological Survey of Canada Technical Note, v. 8, p. 1–30, doi:10.4095/293465.
- Ludwig, K., 2012, Isoplot 3.75: A geochronological toolkit for Microsoft Excel: Berkeley Geochronology Center, [http://www.bgc.org/isoplot\\_etc/isoplot.html](http://www.bgc.org/isoplot_etc/isoplot.html)
- Min, K., Mundil, R., Renne, P.R., and Ludwig, K.R., 2000, A test for systematic errors in  $^{40}\text{Ar}/^{39}\text{Ar}$  geochronology through comparison with U/Pb analysis of a 1.1-Ga rhyolite: Geochimica et Cosmochimica Acta, v. 64, no. 1, p. 73–98, doi:10.1016/S0016-7037(99)00204-5.
- Renne, P.R., Mundil, R., Balco, G., Min, K., and Ludwig, K.R., 2010, Joint determination of  $^{40}\text{K}$  decay constants and  $^{40}\text{Ar}/^{40}\text{K}$  for the Fish Canyon sanidine standard, and improved accuracy for  $^{40}\text{Ar}/^{39}\text{Ar}$  geochronology: Geochimica et Cosmochimica Acta, v. 74, no. 18, p. 5349–5367, doi:10.1016/j.gca.2010.06.017.
- Sandeman, H.A., Archibald, D.A., Grant, J.W., Villeneuve, M.E., and Ford, F.D., 1999, Characterization of the chemical composition and  $^{40}\text{Ar}/^{39}\text{Ar}$  systematics of intralaboratory standard MAC-83 biotite: Radiogenic Age and Isotopic Studies: Geological Survey of Canada Report 12, p. 13–26.
